# Supplementary material for: High-efficiency single-photon generation via large-scale active time multiplexing
Source: PubMed Central journal article supplement — Sci Adv. 2019 Oct 4;5(10):eaaw8586. doi: 10.1126/sciadv.aaw8586 (PMC6777972; doi:10.1126/sciadv.aaw8586), 2019-10-04
Supplement: aaw8586_SM.pdf [file aaw8586_SM.pdf]

## Supplementary Materials for

### **High-efficiency single-photon generation via large-scale active time multiplexing**

F. Kaneda\* and P. G. Kwiat\*

\*Corresponding author. Email: kaneda@riec.tohoku.ac.jp (F.K.); kwiat@illinois.edu (P.G.K.)

Published 4 October 2019, *Sci. Adv.* **5**, eaaw8586 (2019)

DOI: 10.1126/sciadv.aaw8586

#### **This PDF file includes:**

Table S1. Experimental parameters.

Reference (37)

## Supplementary Materials

### Theory of a time-multiplexed HSPS

Here we outline the theory for modeling our time-multiplexed HSPS. First we define the following three probabilities

$$G(k) = \frac{\mu^k}{(1 + \mu)^{k+1}} \quad (\text{S1})$$

$$D(1|k) = \sum_{l=1}^k \eta_t^l (1 - \eta_t)^{k-l} \binom{k}{l} \left(\frac{1}{d}\right)^{l-1} \quad (\text{S2})$$

$$T(M|j, k) = (t_i t_{DL}^{N-j+1})^M (1 - t_i t_{DL}^{N-j+1})^{k-M} \left(\frac{k}{M}\right) \quad (\text{S3})$$

$G(k)$  is the probability that an SPDC source generates  $k$ -photon pairs in a time bin with a mean photon number  $\mu$ . Our SPDC source with 90% indistinguishability can be well approximated by a thermal distribution (38), because  $\sim 0.9^{0.5} = 95\%$  of our SPDC photon pairs are generated into a single Schmidt mode.  $D(1|k)$  is the trigger-photon detection probability conditioned by  $k$  photon pairs created.  $\eta_t$  is the total transmission of the signal photons from the SPDC crystal to SPDs, and  $d$  is the number of SPDs used for a detector cascade. The SPDs are assumed to work as “bucket” detectors discriminating between zero and one-or-more photons. With Eq. S2, a photon-number-resolving (PNR) detector can be simulated with  $d \rightarrow \infty$ , in which case  $D(1|k) \rightarrow k\eta_t(1 - \eta_t)^{k-1}$ .  $T(M|j, k)$  is the  $M$ -photon emission probability conditioned by  $k$  photon-pair generation in the  $j$ -th time bin, where  $t_{DL}$  denotes the transmission of an adjustable delay line for a delay time  $\tau$ , and  $t_i$  is the net transmission of the other optics (including an initial delay line, fiber coupling efficiency, etc.). With Eqs. S1-S3, the multiplexed heralding probability is given by

$$P_H = 1 - \left\{ 1 - \sum_{k_1=1}^{\infty} G(k_1)D(1|k_1) \right\}^N \quad (\text{S4})$$

where  $N$  is the number of multiplexed time bins. The probability of producing an  $M$ -photon state after time multiplexing is given by

$$P_M = \sum_{j=1}^N \left[ 1 - \sum_{k_1=1}^{\infty} \{1 - G(k_1)D(1|k_1)\} \right]^{N-j} \sum_{k_2=1}^{\infty} G(k_2)D(1|k_2)T(M|j, k_2) \quad (\text{S5})$$

The first part in Eq. S5 is the probability that no trigger photon detection has occurred from the  $(j + 1)$ -th to  $N$ -th time bins. The second part is the probability that one of the trigger SPDs clicks in the  $j$ -th time slot, and  $M$  heralded photons are released at the output time window. Thus, the product of the first and second parts for each  $j$  describes the probability that the latest heralding signal is generated in the  $j$ -th time bin and an  $M$ -photon state is emitted from an adjustable delay line after  $(N - j)\tau$  delay. While previous time-multiplexing schemes (3, 5) heralded photons in the earliest time bins, multiplexing

the latest-born heralded photons reduces the effective loss in the adjustable delay line. Table S1 shows a list of our experimental parameters to simulate the theoretical curves shown in Fig. 2A-2C and the possible improved source characteristics in the main text.

**Table S1. Experimental parameters.**

| Parameter                                  | Symbol               | Value     |           |                      |       |
|--------------------------------------------|----------------------|-----------|-----------|----------------------|-------|
|                                            |                      | This work |           | Possible improvement |       |
| Number of multiplexed time bins            | $N$                  |           | 40        |                      | 100   |
| Trigger-photon system detection efficiency | $\eta_t$             |           | 0.53      |                      | 0.85  |
| Number of trigger SPDs                     | $d$                  |           | 4         |                      | 16    |
| Adjustable delay line cycle transmission   | $t_{DL}$             |           | 0.988     |                      | 0.992 |
| Other optics transmission                  | $t_i$                |           | 0.83      |                      | 0.85  |
| Multiplexing system repetition rate (kHz)  | $R$                  |           | 500       |                      | 5000  |
| Mean photon number per pulse               | $\mu$                | 0.004     | 0.05      | 0.18                 | 0.1   |
| Single-photon probability                  | $P_1$                | 0.051(2)  | 0.412(13) | 0.667(24)            | 0.75  |
| Second-order auto-correlation function     | $g^{(2)}(t=0)$       | 0.007(7)  | 0.088(7)  | 0.269(7)             | 0.05  |
| Spectral temporal indistinguishability     | $I$                  | 0.91(4)   | 0.90(3)   | 0.92(3)              | 0.99  |
| Single-photon generation rate (kcps)       | $C_1$<br>(= $P_1R$ ) | 25.5(10)  | 206(7)    | 334(12)              | 3800  |
